# Supplementary material for: Tree Size Inequality Reduces Forest Productivity: An Analysis Combining Inventory Data for Ten European Species and a Light Competition Model
Source: PubMed Central journal article supplement (PMC4801349; doi:10.1371/journal.pone.0151852), 2016-03-21
Supplement: pone.0151852.s002.pdf [file pone.0151852.s002.pdf]

# S2\_Appendix : Comparison of different analysis methods: lm vs. nls.

This appendix has been created to compare two different methods we tested to analyse the data from the French National Forest Inventory used in Bourdier et al. submitted.

---

The two methods tested were:

1. The log transformed version of the model

$$\log(dG) = \alpha_0 + \alpha_1 WB.y + \alpha_2 sgdd + \beta \log BA + \gamma QMD7.5 + \delta GCba + \epsilon$$

2. Non-linear model using 'nls' in R

$$dG = e^{\alpha_0 + \alpha_1 WB.y + \alpha_2 sgdd} * BA^\beta * e^{\gamma QMD7.5 + \delta GCba} + \epsilon$$

---

AIC table showing results from both models

| Species | deltaAIC_lm | deltaAIC_nls |
|---------|-------------|--------------|
| PinSyl  | 0           | 854.54       |
| QuePet  | 0           | 568.3        |
| QueRob  | 0           | 386.26       |
| PinPin  | 0           | 390.08       |
| FagSyl  | 0           | 456.3        |
| QuePub  | 0           | 279.53       |
| AbiAlb  | 0           | 77.74        |
| PinHal  | 0           | 49.44        |
| PicAbi  | 0           | 66.4         |
| LarDec  | 0           | 93.44        |

For all species, the linear model using lm on the log transformed scale yields better results than the nls method.
