# Supplementary material for: Tree Size Inequality Reduces Forest Productivity: An Analysis Combining Inventory Data for Ten European Species and a Light Competition Model
Source: PubMed Central journal article supplement (PMC4801349; doi:10.1371/journal.pone.0151852), 2016-03-21
Supplement: pone.0151852.s003.pdf [file pone.0151852.s003.pdf]

### S3\_Appendix: P-values from the models for the ten species

This document presents the p-values from the lm models used in Bourdier et al. submitted.

| Species | (Intercept) | WB.y      | logBA      | QMD7.5     | GCba      | sgdd      |
|---------|-------------|-----------|------------|------------|-----------|-----------|
| PinSyl  | 1.090e-117  | 1.322e-09 | 2.857e-100 | 2.277e-40  | 6.343e-03 | NA        |
| QuePet  | 1.133e-131  | 6.726e-15 | 2.852e-101 | 4.133e-79  | 2.307e-05 | NA        |
| QueRob  | 8.672e-48   | 1.171e-04 | 7.422e-87  | 1.981e-103 | 2.428e-08 | 5.034e-02 |
| PinPin  | 7.276e-10   | 1.436e-15 | 2.684e-117 | 5.361e-128 | 2.206e-17 | 8.589e-06 |
| FagSyl  | 3.975e-52   | 6.598e-08 | 4.435e-50  | 6.082e-72  | 1.741e-06 | 3.212e-12 |
| QuePub  | 1.174e-66   | 5.516e-08 | 4.381e-99  | 9.112e-37  | 6.565e-01 | 1.226e-01 |
| AbiAlb  | 3.441e-21   | 8.966e-05 | 5.256e-28  | 1.273e-32  | 3.163e-02 | 1.163e-06 |
| PinHal  | 2.384e-31   | NA        | 2.236e-23  | 3.010e-15  | 4.748e-02 | NA        |
| PicAbi  | 6.341e-20   | 1.659e-04 | 2.169e-27  | 3.796e-22  | 8.743e-02 | 5.205e-05 |
| LarDec  | 1.185e-21   | 6.998e-02 | 1.511e-12  | 3.983e-14  | 6.934e-01 | NA        |
